# Supplementary material
Source: PubMed Central journal article supplement (PMC2587092)

**Supplementary Table** Oligonucleotide primers used in PCR-based experiments

| Gene name        | Amplified region | Experiment    | Forward primer (5' to 3')      | Reverse primer (5' to 3')    |
|------------------|------------------|---------------|--------------------------------|------------------------------|
| <i>Mapk14</i>    | Downstream loxP  | Genotyping    | atgagatgcagtagcccttgagaccagaag | agccagggtatacagagaaaaacctgtg |
| <i>Cre</i>       | ORF              | Genotyping    | ggctgatgcaacgagtgatgaggt       | cagcattgctgtcactgtgtcgtg     |
| <i>Mapk14</i>    | Exon 2           | KO efficiency | ggtcagcagcctcgatgcac           | gactgccctccaaccgttc          |
| <i>Mapk14</i>    | Exon 12          | KO efficiency | gccctccctcacttcaggag           | ttgtctggcactggagacc          |
| <i>Dusp1</i>     | Promoter         | ChIP          | gtctttgctttggcttgg             | cgcggtttatgtagcctct          |
| <i>Il10</i>      | Promoter         | ChIP          | cagaagttcattccgaccagt          | cctctggccaaaggtttt           |
| <i>Nfkbia</i>    | Promoter         | ChIP          | aaagttccctgtgcatgacc           | ggaattccaagccagtcag          |
| <i>Areg</i>      | cDNA             | qPCR          | atgggactgtgcacgccatt           | atttccgggtgtgcttggcaat       |
| <i>Bcl2a1</i>    | cDNA             | qPCR          | ttgtgcagaaattcataatgaataacaca  | aaactctttatgaagccatctccc     |
| <i>Bcl3</i>      | cDNA             | qPCR          | ttactctaccccacgatgg            | ggtgagtaggcaggttcagc         |
| <i>Birc2</i>     | cDNA             | qPCR          | ggaaattgactccacgttatatgaaaact  | gtcttccaatgacaagcctga        |
| <i>Birc2</i>     | cDNA             | qPCR          | ggaaattgaccctcggtatatacaga     | tctcggtccatacacactttacacat   |
| <i>Ccl2</i>      | cDNA             | qPCR          | gccagctctcttctcca              | cccagaagcatgacagggac         |
| <i>Ccl3</i>      | cDNA             | qPCR          | ccaagctcttcagcgccat            | tccgctgtgaggagaagcag         |
| <i>Ccl4</i>      | cDNA             | qPCR          | gacttggagtgaactgagcagc         | aggcctctcctgaagtggc          |
| <i>Ccl5</i>      | cDNA             | qPCR          | aatccctactcccactcgg            | ttcttgggttctgtgtag           |
| <i>Ccrl2</i>     | cDNA             | qPCR          | tgctcttctctgctggtt             | gaagctctgccttctcctca         |
| <i>Cd38</i>      | cDNA             | qPCR          | ggaaagatgtccaccctgga           | ccacctgagatcatcagcaa         |
| <i>Cflar</i>     | cDNA             | qPCR          | tttgcattgcagctgggtaa           | gggtcacagaaattgtggc          |
| <i>Ch25h</i>     | cDNA             | qPCR          | ccacgacatgcatcactctc           | gcattttgtcccagtggtg          |
| <i>Cish</i>      | cDNA             | qPCR          | cccagaggaagtgcagaggg           | ggtctagcacctcgggtca          |
| <i>Csf2</i>      | cDNA             | qPCR          | ggccttggaaagcatgtagag          | gcatgtcatccaggagggtc         |
| <i>Cxcl1</i>     | cDNA             | qPCR          | gccaatgagctgcgctgt             | cctcaagctctgagttcttg         |
| <i>Cxcl10</i>    | cDNA             | qPCR          | gaatccggaatctaagaccatcaa       | gtgcgtggcctcactccag          |
| <i>Cxcl2</i>     | cDNA             | qPCR          | atccagagctgagtgtagcgc          | aaggcaaacctttgaccgcc         |
| <i>Dusp1</i>     | cDNA             | qPCR          | ccatctgccttgcctacctc           | aagctgaagttcggggagat         |
| <i>Edn1</i>      | cDNA             | qPCR          | aaggcatcttctggttgc             | ttgtgctcaactctgtgct          |
| <i>G1p2</i>      | cDNA             | qPCR          | acccttccagctctgggtct           | tcgctgagttctgtaccac          |
| <i>Gadd45b</i>   | cDNA             | qPCR          | tatttgacagccccctcatc           | cccagaaggtatcacgggta         |
| <i>Gpr109a</i>   | cDNA             | qPCR          | atgaaaacatgcaccaaggtc          | ccaggagtccaacacaaat          |
| <i>Hdc</i>       | cDNA             | qPCR          | agcacaagctgtcgtccttt           | gctgttcttctctgtgtc           |
| <i>Icam1</i>     | cDNA             | qPCR          | tggccctgcaatggctt              | gcaggaaggcttctctgggat        |
| <i>Icosl</i>     | cDNA             | qPCR          | ctccagggatcaatgtggac           | atggagtccagggacagatg         |
| <i>Ifnb1</i>     | cDNA             | qPCR          | agctccaagaaaggacgaacat         | gccctgtaggtgaggtgact         |
| <i>Il10</i>      | cDNA             | qPCR          | gaagctgaagaccctcagga           | ttttcacaggggagaaatcg         |
| <i>Il12a</i>     | cDNA             | qPCR          | cagaaacctcctgtgggaga           | ggagctcagatagccatca          |
| <i>Il12b</i>     | cDNA             | qPCR          | atccagcgaagaaagaaaa            | ggaacgcaccttctgtgta          |
| <i>Il15</i>      | cDNA             | qPCR          | atcctgtgtgttggagg              | gtgcttgaagagccagagg          |
| <i>Il1a</i>      | cDNA             | qPCR          | tccaagggcagagaggaggt           | ggaacttggccatctgatt          |
| <i>Il1b</i>      | cDNA             | qPCR          | gtggctgtggagaagctgtg           | gaagggtccagggaaagacac        |
| <i>Il6</i>       | cDNA             | qPCR          | ccagaaacccgctatgaagttcc        | ttgtcaccagcatcagctcc         |
| <i>Krt14</i>     | cDNA             | qPCR          | ggcaagagtgcatttctgagc          | tttcatgctgagctgggact         |
| <i>Mapk11</i>    | cDNA             | qPCR          | taccatgaccctgacgatga           | tccttggcctcaacactttc         |
| <i>Mapk12</i>    | cDNA             | qPCR          | cccctcctgagttgttcag            | agggaggccttccatgtagt         |
| <i>Mapk13</i>    | cDNA             | qPCR          | gtctgttgggtgcatcatgg           | tccttgccttgaagagtg           |
| <i>Mapk14</i>    | cDNA             | qPCR          | gcacgtgtggcagttaaaga           | gtccttttggcgtgatgat          |
| <i>Mmp13</i>     | cDNA             | qPCR          | tttattgttgcctcatga             | ggtccttggagtgatccaga         |
| <i>Nfkbia</i>    | cDNA             | qPCR          | ctcacggaggacggagactc           | ctctctgttgatgattcca          |
| <i>Nos2</i>      | cDNA             | qPCR          | caagcaccctggaagaggag           | ccaaatgtgctgtcaccac          |
| <i>Pde4b</i>     | cDNA             | qPCR          | gaggggaatggagattagcc           | tgggattttccacagaagc          |
| <i>Pml</i>       | cDNA             | qPCR          | ggaaacagaggagcgagttg           | cagattctcgggtgccgaat         |
| <i>Ppia</i>      | cDNA             | qPCR          | atggtcaacccaccctgt             | ttctgtgcttggaaacttctg        |
| <i>Ptgs2</i>     | cDNA             | qPCR          | ccccacagtcaaaagacact           | ggttctcagggtgtgagga          |
| <i>Sdc4</i>      | cDNA             | qPCR          | atctggatgacacggaggag           | gcatttccagggatgtggtt         |
| <i>Serpina3g</i> | cDNA             | qPCR          | ccaaatggtgaggggtcttct          | gcatagcggatcaccaaaaca        |
| <i>Serpib2</i>   | cDNA             | qPCR          | tttcttctgaggtgtccatcaa         | ccagctgccacagtgcc            |
| <i>Serpine1</i>  | cDNA             | qPCR          | gtcttccgaccaagagcag            | caaaggctgtggaggaagac         |
| <i>Sod2</i>      | cDNA             | qPCR          | ggccaagggagatgttcaaa           | aatatgtccccaccattga          |
| <i>Tnf</i>       | cDNA             | qPCR          | acagaaagcatgatcccg             | gccccctcttttggg              |
| <i>Tnfaip3</i>   | cDNA             | qPCR          | cagttccgagagatcatccaaaag       | catgaggcagtttccatcaca        |
| <i>Tnfsf10</i>   | cDNA             | qPCR          | ggatattggcctgctgtaga           | gttccagctgccttctctg          |
| <i>Usp18</i>     | cDNA             | qPCR          | gacgcaaacctctgaaaac            | cacatgctggagctgtctaa         |
| <i>Vcam1</i>     | cDNA             | qPCR          | aacggtactttgatactgtttgca       | gcaagtgagggccatgga           |
| <i>Zc3h12a</i>   | cDNA             | qPCR          | caacgctctcctcaccctc            | ggaaggcctctggtcattt          |

## SUPPLEMENTARY FIGURE LEGENDS

**Supplementary Figure 1** p38 $\alpha^{\Delta M}$  and p38 $\alpha^{\Delta K}$  mice exhibit efficient, cell type-specific *Mapk14* ablation. **(a)** WT and cell type-specific p38 $\alpha$  knockout mice used in the study. **(b)** Genomic DNA from WT and p38 $\alpha^{\Delta M}$  BMDMs was analyzed by qPCR with primer pairs specific to exon 2 and exon 12 of the p38 $\alpha$  gene *Mapk14*. Relative copy numbers of exon 2, which is flanked by loxP sites, versus exon 12 are shown as percent dosage. **(c)** Genomic DNA from the liver and epidermis of WT and p38 $\alpha^{\Delta K}$  mice were analyzed as in **(b)**. Data are representative of analysis of three independently generated BMDM preparations **(b)** or five litters **(c)**.

**Supplementary Figure 2** p38 $\alpha$  deletion does not affect the expression of other p38 isoforms. Expression of p38 isoforms in BMDMs, PEMs, keratinocytes (Kc), MEFs, B16 (mouse melanoma) cells, and splenic T cells (TC) was analyzed by qPCR. p38 $\alpha$ , p38 $\beta$ , p38 $\gamma$ , and p38 $\delta$  are encoded by *Mapk14*, *Mapk11*, *Mapk12*, and *Mapk13*, respectively. Data are from analysis of the same set of cDNA samples in duplicate.

**Supplementary Figure 3** Cre recombinase does not perturb gene expression in macrophages and keratinocytes. **(a)** Gene expression in WT and *LysMCre* BMDMs ( $n=2$ ) after 4 h of LPS treatment was analyzed by qPCR. **(b)** The shaved back skin of WT and *K14Cre* mice (one animal of each genotype) was irradiated with UVB (160 mJ/cm<sup>2</sup>). After 96 h, gene expression in the epidermal tissues in two separate skin areas was analyzed by qPCR.

**Supplementary Figure 4** Myeloid p38 $\alpha$  signaling is essential for induction of keratotic lesions in SDS-treated skin. The shaved back skin of the indicated mice was treated daily with 5% SDS, and photographed on day 7. Data are representative of five independent experiments involving a group of three to five mice.

**Supplementary Figure 5** UVB-induced skin injury depends on epithelial p38 $\alpha$  signaling. The shaved back skin of the indicated mice was irradiated with UVB (160 mJ/cm<sup>2</sup>), and photographed on day 4. Arrowheads (red) indicate 'sunburn' lesions. Data are representative of six independent experiments involving a group of three to five mice.

**Supplementary Figure 6** p38 $\alpha^{\Delta M}$  PEMs are defective in LPS induction of the same set of p38 $\alpha$  target genes identified from experiments using BMDMs. Expression of genes in WT and p38 $\alpha^{\Delta M}$  PEMs ( $n=3$ ) after 0, 2, and 4 h of LPS treatment was analyzed by qPCR.

**Supplementary Figure 7** p38 $\alpha^{\Delta M}$  neutrophils do not exhibit impaired migration toward KC and MIP-2. **(a)** Whole cell lysates from WT and p38 $\alpha^{\Delta M}$  neutrophils (isolated from one animal of each genotype) were analyzed by immunoblotting with anti-p38 $\alpha$  and anti-actin. **(b)** Migration of WT and p38 $\alpha^{\Delta M}$  neutrophils was analyzed by a transwell assay ( $n=2$ ) without or with the chemokines indicated.

**Supplementary Figure 8** Removal of p38 $\alpha$  does not impair NF- $\kappa$ B activation. **(a, b)** Cytoplasmic (Cyto) and nuclear (Nuc) extracts from BMDMs treated with LPS **(a)**, and

keratinocytes irradiated with UVB (**b**) were prepared at the indicated time points and analyzed by immunoblotting with antibodies against the proteins indicated on the left. Data are representative of two independent experiments.

**Supplementary Figure 9** Removal of p38 $\alpha$  in macrophages does not lead to a change in ROS production. BMDMs were left untreated or treated with LPS for 30 min, and then incubated with dichlorodihydrofluorescein diacetate for additional 30 min. ROS production (fluorescence) was analyzed by confocal microscopy. Fluorescence and bright field images are shown in pair. The numbers represent relative fluorescence intensities. Data are representative of at least three independent images.

**Supplementary Figure 10** Stability of mRNA in WT and p38 $\alpha^{\Delta M}$  BMDMs was analyzed by qPCR. Cells were treated with LPS for 2 h and then incubated with actinomycin D (actD) for the indicated durations before RNA isolation. Data are from one experiment.

**Supplementary Figure 11** p38 $\alpha$  signaling plays cell type-specific roles in regulation of inflammation. The thickness of lines indicates the relative strength of the signaling events that they denote. (**a**) SDS-induced chronic skin inflammation. (**b**) UVB or TPA-induced acute skin inflammation.

Supplementary Figure 1

**a**

|                                          |                                       |                                |
|------------------------------------------|---------------------------------------|--------------------------------|
| <b>WT</b>                                | <i>Mapk14<sup>fl/fl</sup></i>         | p38 $\alpha$ wild type         |
| <b>p38<math>\alpha^{\Delta M}</math></b> | <i>Mapk14<sup>fl/fl</sup>;LysMCre</i> | Myeloid-specific knockout      |
| <b>p38<math>\alpha^{\Delta K}</math></b> | <i>Mapk14<sup>fl/fl</sup>;K14Cre</i>  | Keratinocyte-specific knockout |

**b**

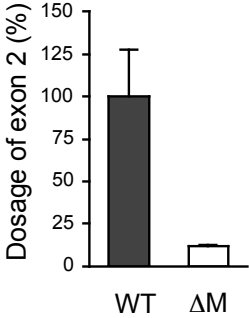

**c**

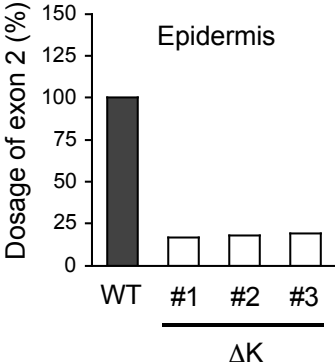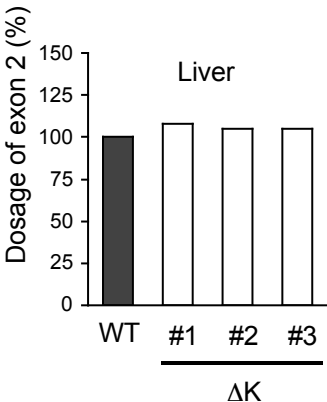

# Supplementary Figure 2

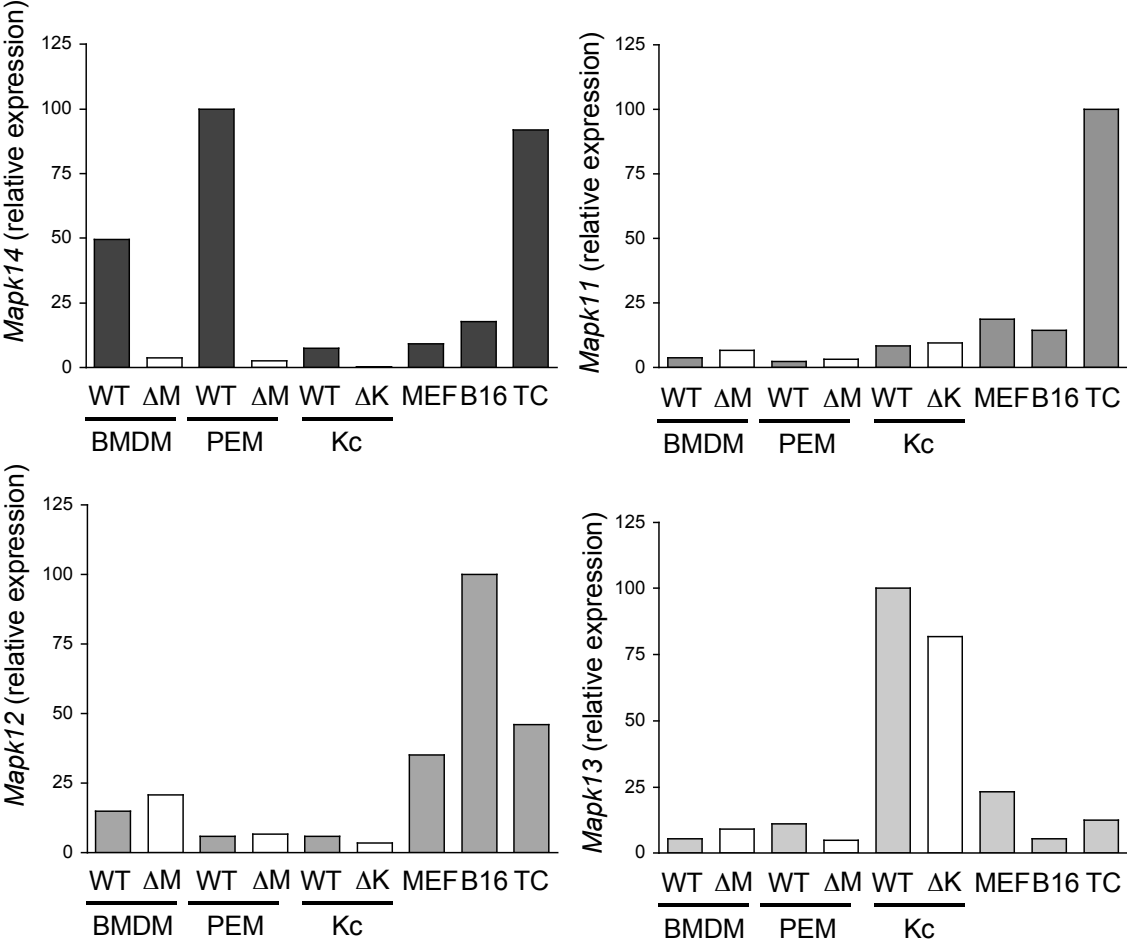

Supplementary Figure 3

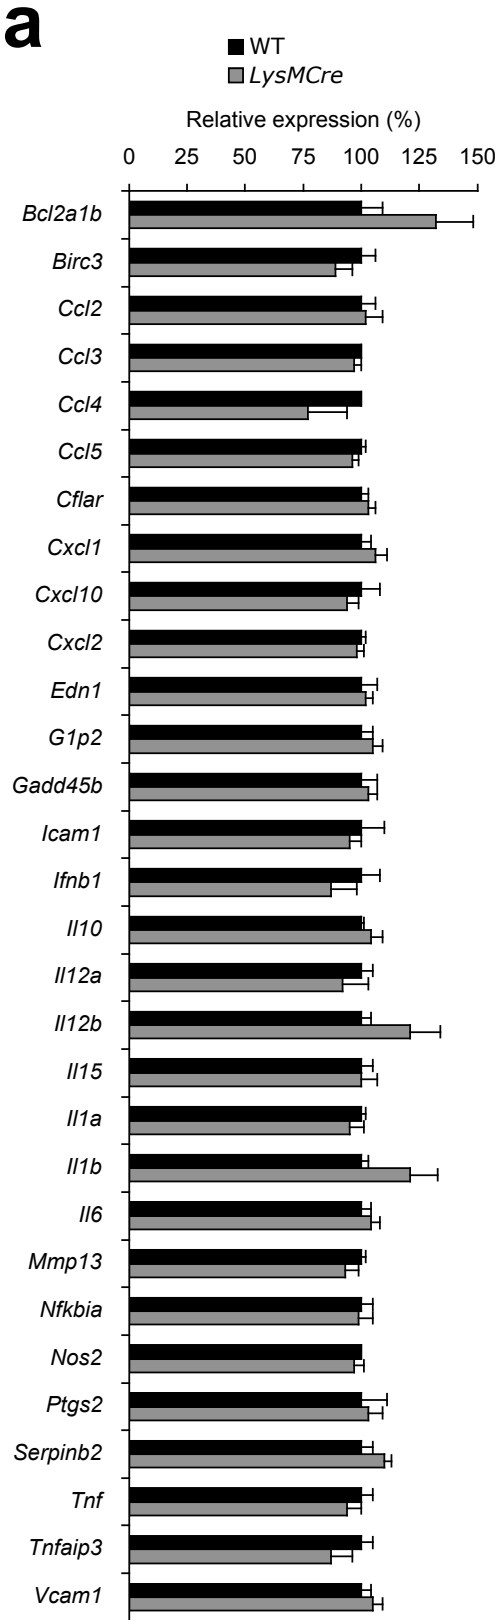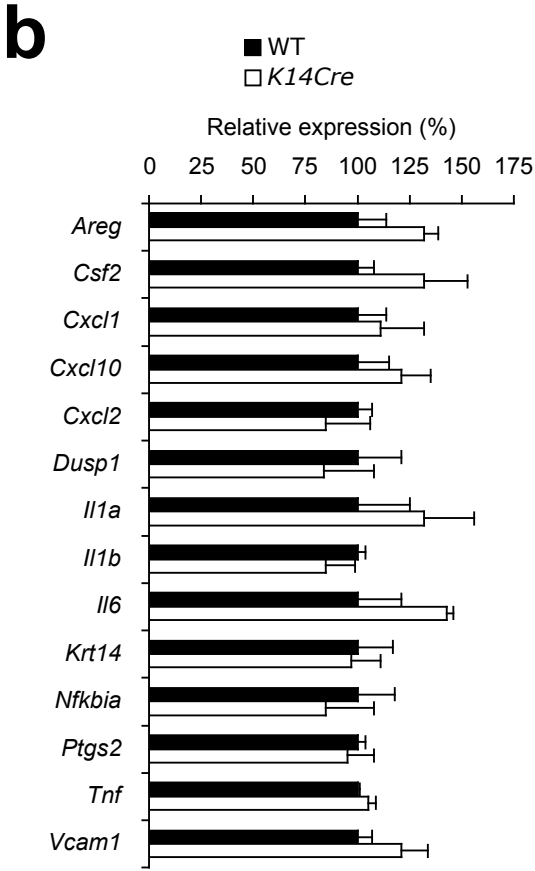

Supplementary Figure 4

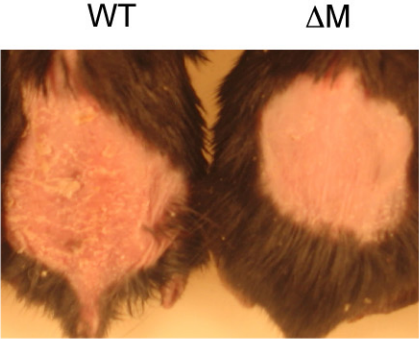



Supplementary Figure 5

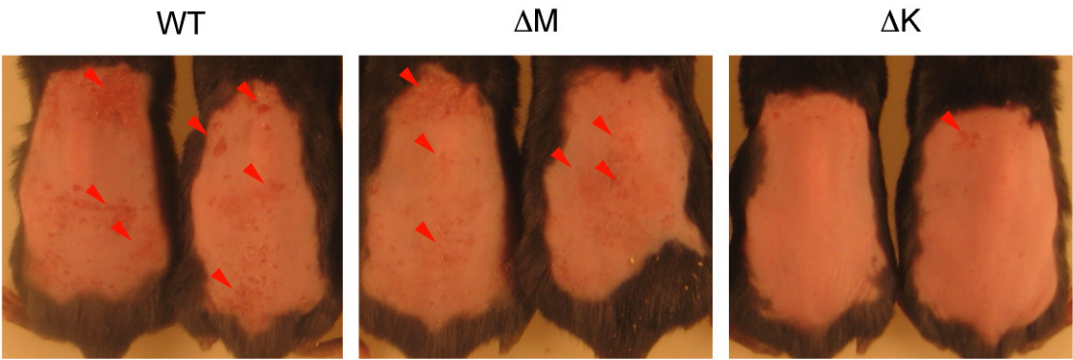

# Supplementary Figure 6

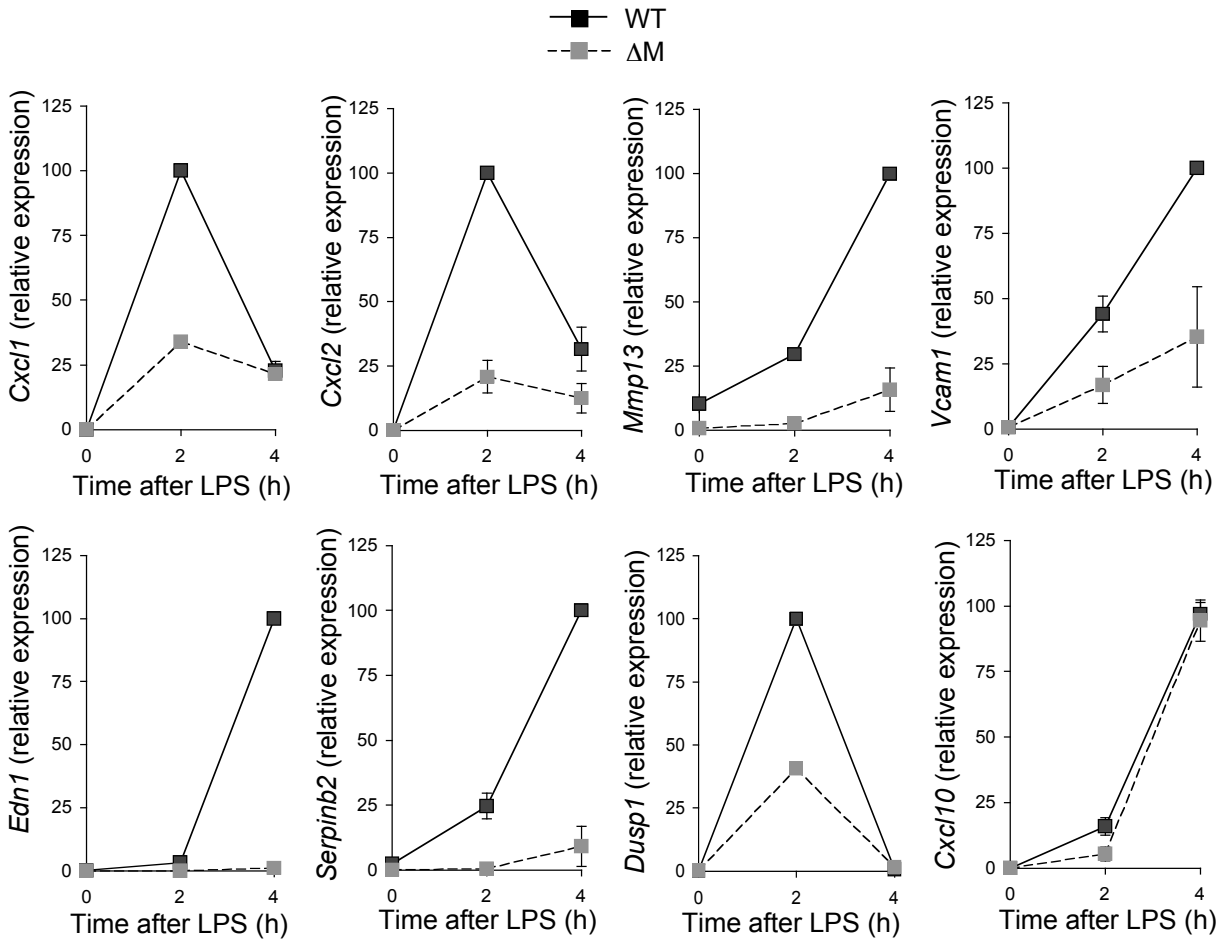

Supplementary Figure 7

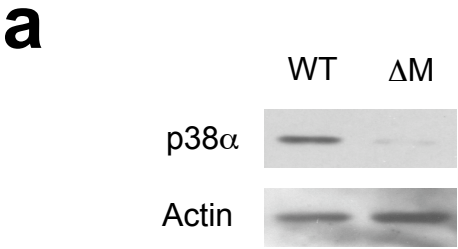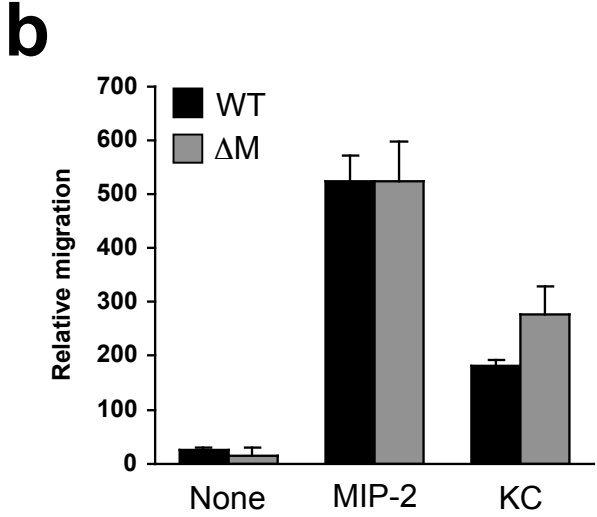

Supplementary Figure 8

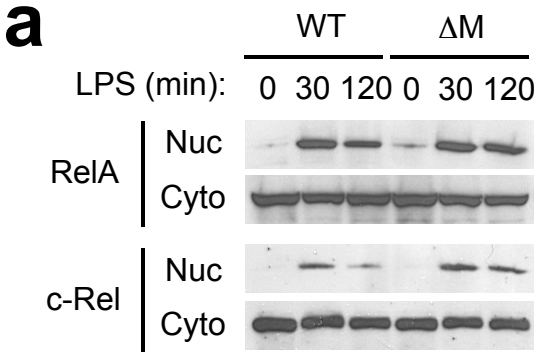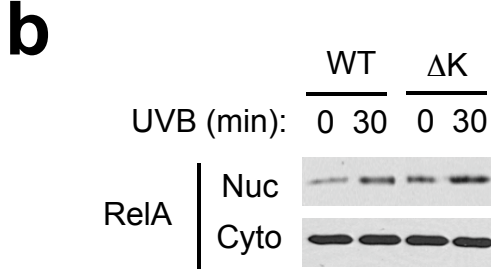

Supplementary Figure 9

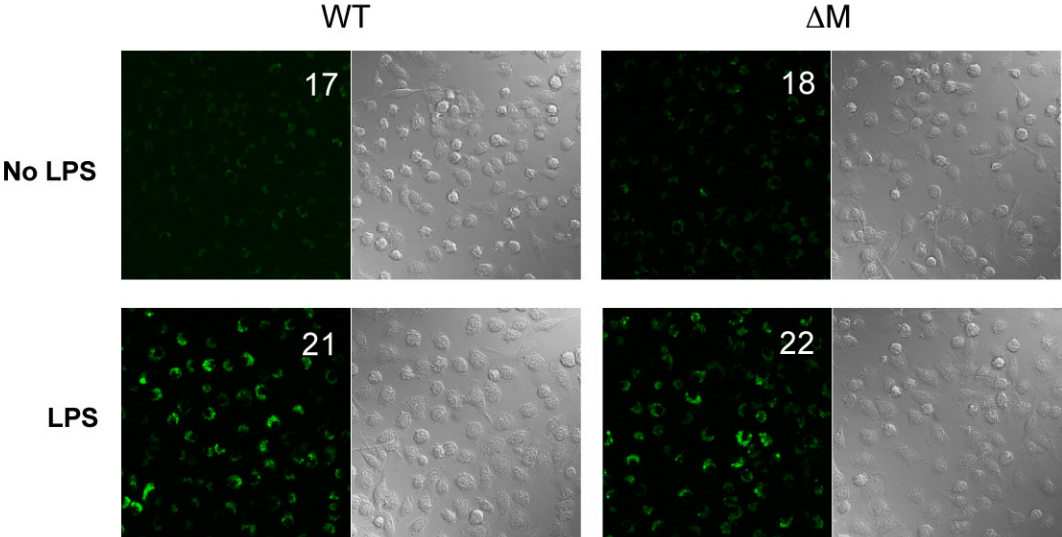

# Supplementary Figure 10

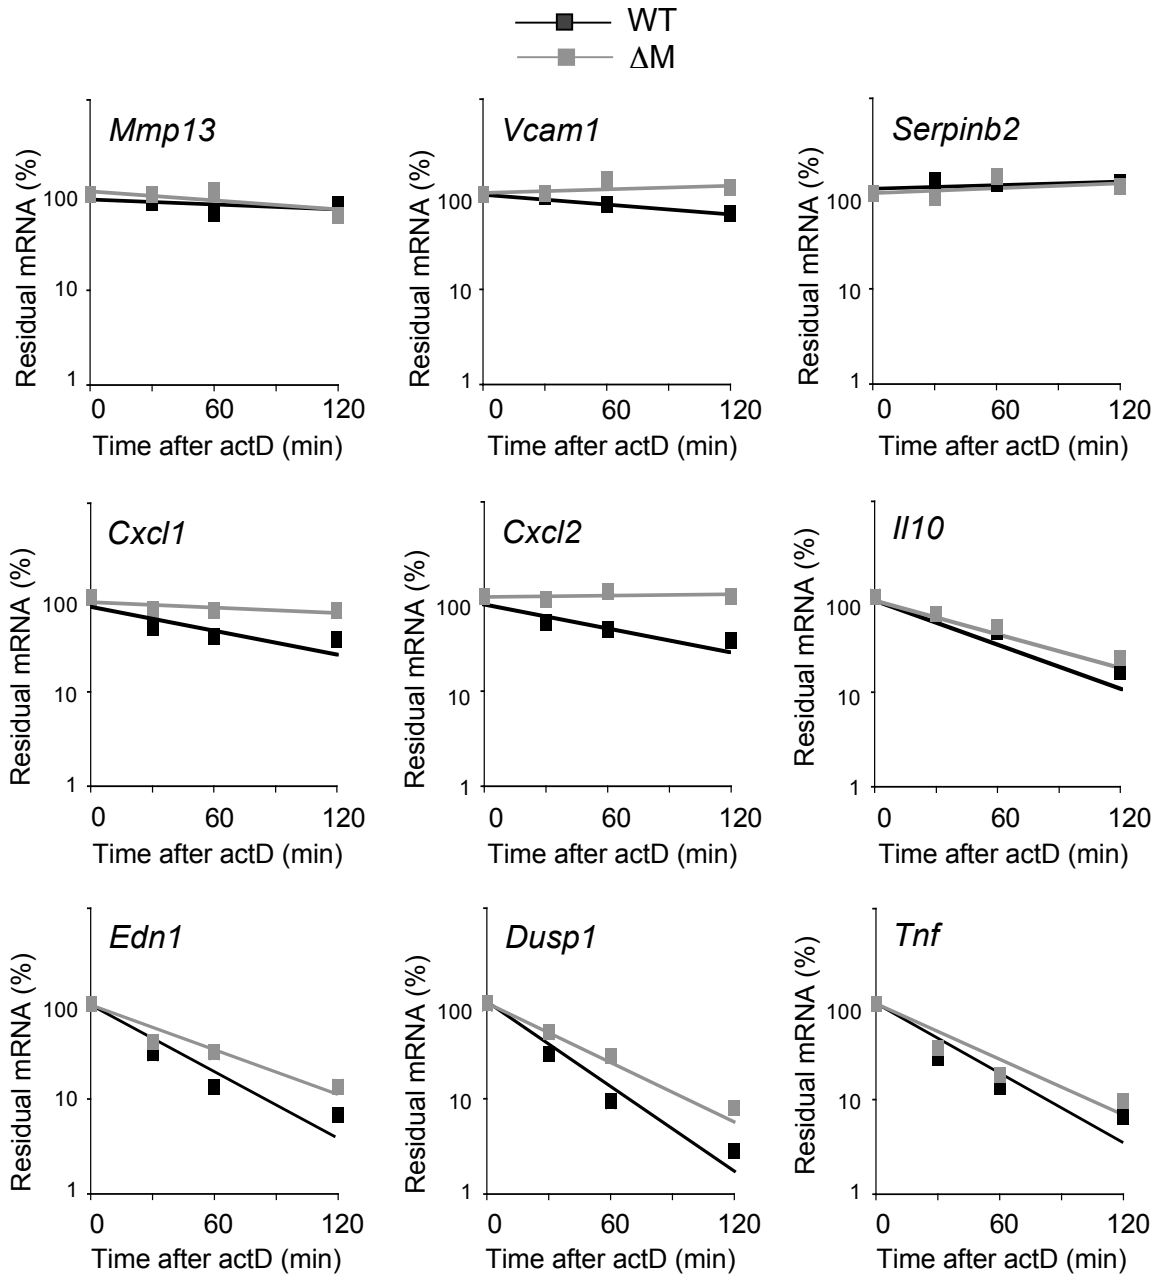

Supplementary Figure 11

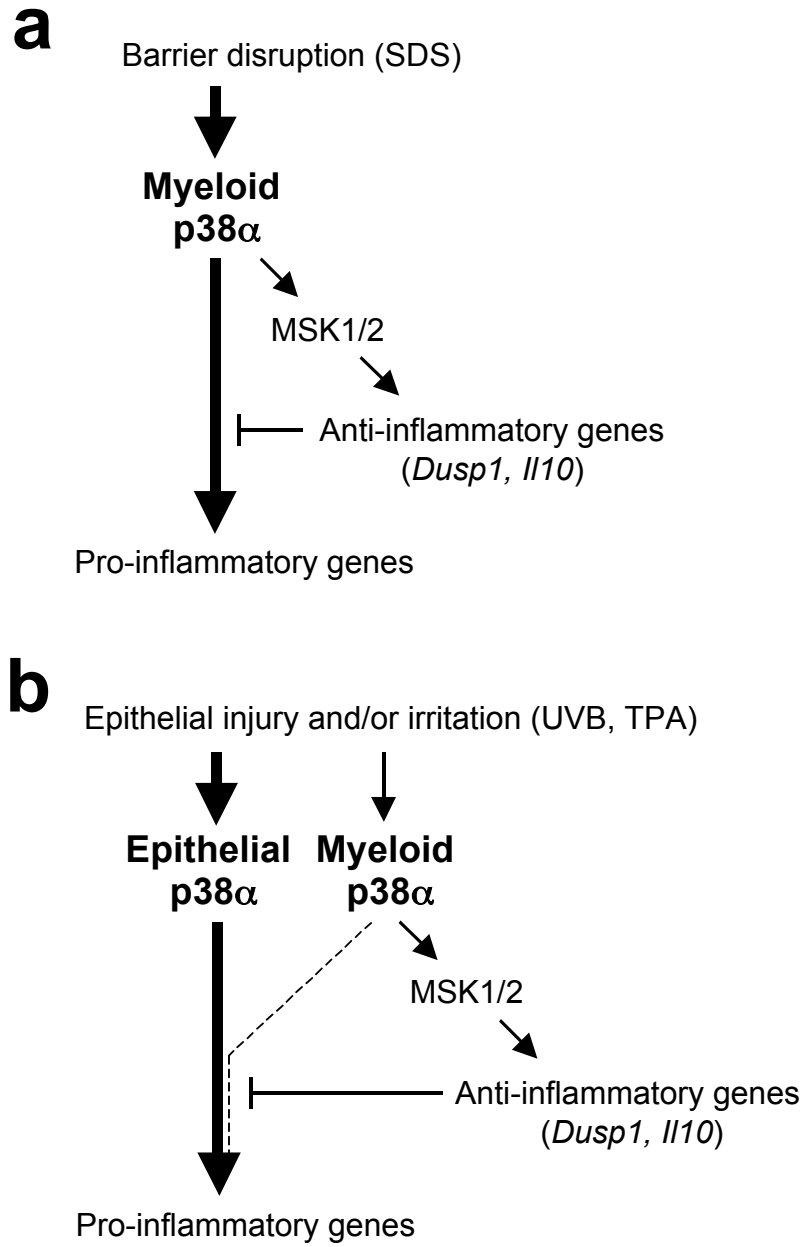

Supplement: NIHMS57741-supplement-Supplementary.pdf [file NIHMS57741-supplement-Supplementary.pdf]
